# Supplementary material for: Electro-driven direct lithium extraction from geothermal brines to generate battery-grade lithium hydroxide
Source: Springer Nature journal article supplement (doi:10.1038/s41467-025-56071-x), 2025-01-18
Supplement: MOESM1 [file 41467_2025_56071_MOESM1_ESM.pdf › 41467_2025_56071_MOESM1_ESM.pdf]

# Supplementary Information

## Electro-driven direct lithium extraction from geothermal brines to generate battery-grade lithium hydroxide

Lingchen Kong<sup>1</sup>, Gangbin Yan<sup>2</sup>, Kejia Hu<sup>1</sup>, Yongchang Yu<sup>1</sup>, Nicole Conte<sup>3</sup>, Kevin R. Mckenzie Jr<sup>3</sup>, Michael J. Wagner<sup>3</sup>, Stephen G. Boyes<sup>3</sup>, Hanning Chen<sup>4\*</sup>, Chong Liu<sup>2\*</sup>, and Xitong Liu<sup>1\*</sup>

*<sup>1</sup>Department of Civil and Environmental Engineering, The George Washington University,  
Washington, D.C. 20052, United States*

*<sup>2</sup>Pritzker School of Molecular Engineering, University of Chicago, Chicago, IL 60637, United  
States*

*<sup>3</sup>Department of Chemistry, The George Washington University, Washington, D.C. 20052, United  
States*

*<sup>4</sup>Texas Advanced Computing Center, the University of Texas at Austin, Austin, TX 78758, United  
States*

### Corresponding authors:

[xitongliu@gwu.edu](mailto:xitongliu@gwu.edu);

[chongliu@uchicago.edu](mailto:chongliu@uchicago.edu)

[hanning.chen@austin.utexas.edu](mailto:hanning.chen@austin.utexas.edu)

## Table of Contents

|                                                                                                                                                                                                                                                                                     |    |
|-------------------------------------------------------------------------------------------------------------------------------------------------------------------------------------------------------------------------------------------------------------------------------------|----|
| Fig. S1. Schematics showing the water stability window marked by H <sub>2</sub> and O <sub>2</sub> evolution reactions in geothermal brine. (Ewe indicates working electrode potential) .....                                                                                       | 3  |
| Fig. S2. CV curve of FePO <sub>4</sub> in 1 M lithium chloride aqueous solution at a 1 mV/s scan rate. (Ewe indicates working electrode potential and I indicates specific current).....                                                                                            | 4  |
| Fig. S3. Electrochemical Impedance Spectroscopy (EIS) measurements in the cell system. ....                                                                                                                                                                                         | 5  |
| Fig. S4. XRD patterns of as-fabricated LiFePO <sub>4</sub> and pre-delithiated FePO <sub>4</sub> .....                                                                                                                                                                              | 6  |
| Table S1. Compositions of geothermal brines used in this study. ....                                                                                                                                                                                                                | 7  |
| Fig. S5. Specific capacity vs. Ewe curve by feeding DI water and 5 mM LiCl for Li release. (Ewe indicates working electrode potential).....                                                                                                                                         | 8  |
| Table S2. Atomic composition of LiFePO <sub>4</sub> particle as different extraction stages. ....                                                                                                                                                                                   | 9  |
| Fig. S6. Module and system design of the Li extraction unit .....                                                                                                                                                                                                                   | 10 |
| Fig. S7. (a) Extraction efficiency in six series of extraction. The initial lithium concentration in the brine is 42 mM; after extraction in six cells in series, the lithium concentration remaining in the brine is 6.2 mM. (b) Photos of brine before and after extraction. .... | 11 |
| Table S3. Calculated enthalpy change, $\Delta H_{rxn}$ , and activation energy, $\Delta E_{act}$ , for the diffusion of various cations.....                                                                                                                                        | 12 |
| Table S4. Calculated shortest metal-oxygen bond length, $DM - O$ for the initial, transition and final states along the cation's migration pathway.....                                                                                                                             | 13 |
| Fig. S8. Metal element concentration percentage in the purification process.....                                                                                                                                                                                                    | 14 |
| Table S5. Other parameters used for the techno-economic assessment.....                                                                                                                                                                                                             | 15 |
| Table S6. Parameters for fresh water consumption calculations.....                                                                                                                                                                                                                  | 16 |
| Fig. S9. pH values from the effluent in dilute-in channel along time. ....                                                                                                                                                                                                          | 17 |
| Table S7. Lithium selectivity over major metal elements with different direct lithium extraction technologies from brines.....                                                                                                                                                      | 18 |
| Fig. S10. Photo of as-fabricated LiFePO <sub>4</sub> composite electrode.....                                                                                                                                                                                                       | 20 |
| Fig. S11. Specific capacity vs. Ewe curve in pre-delithiation process. (Ewe indicates working electrode potential) .....                                                                                                                                                            | 21 |
| Fig. S12. 3D schematic diagram of intercalative deionization cell for lithium extraction experiment. ....                                                                                                                                                                           | 22 |

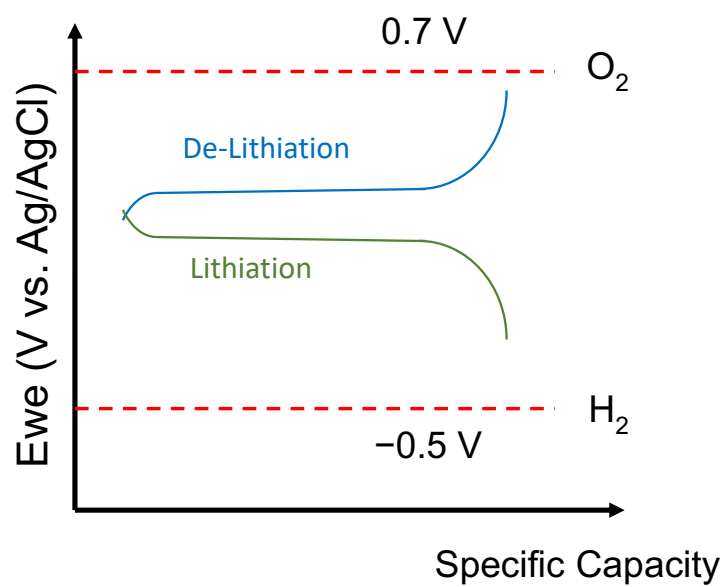

**Fig. S1. Schematics showing the water stability window marked by H<sub>2</sub> and O<sub>2</sub> evolution reactions in geothermal brine. (Ewe indicates working electrode potential)**

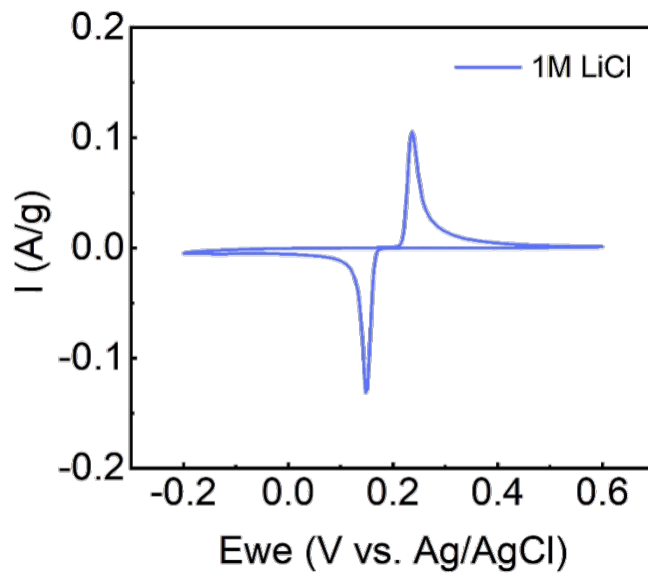

**Fig. S2. CV curve of FePO<sub>4</sub> in 1 M lithium chloride aqueous solution at a 1 mV/s scan rate. (Ewe indicates working electrode potential and I indicates specific current). The potential is not IR corrected. Source data are provided as a Source Data file.**

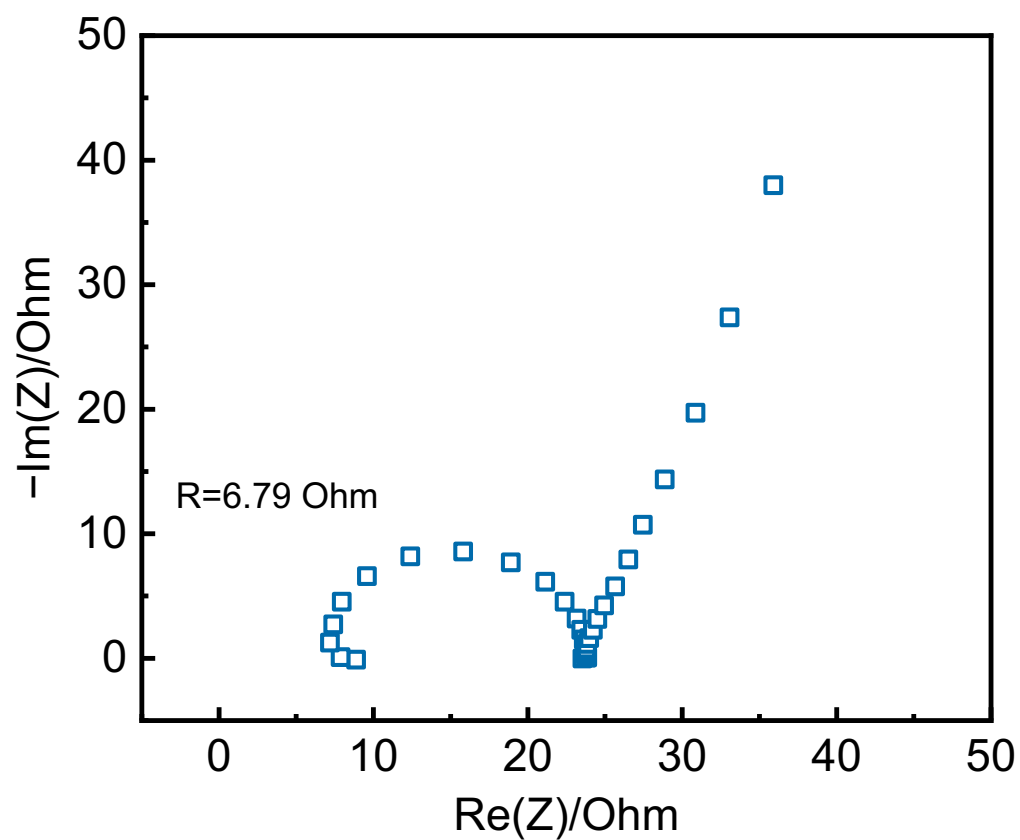

**Fig. S3. Electrochemical Impedance Spectroscopy (EIS) measurements in the flow cell system. Source data are provided as a Source Data file.**

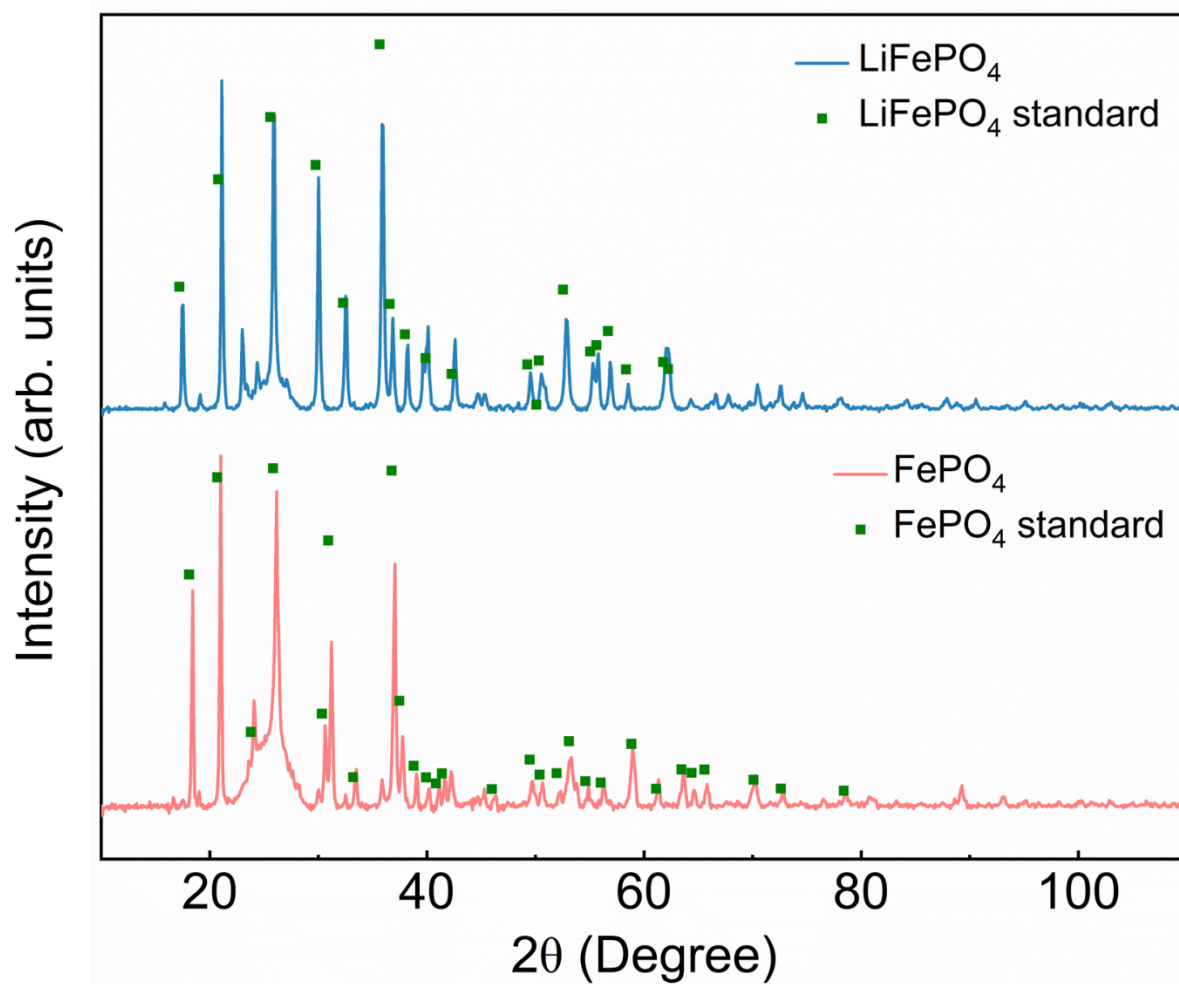

**Fig. S4. XRD patterns of as-fabricated LiFePO<sub>4</sub> and pre-delithiated FePO<sub>4</sub>. Source data are provided as a Source Data file.**

**Table S1. Compositions of geothermal brines used in this study.****a**, major components in Salton Sea wellhead geothermal brine.

| Analyte   | Concentration (mM) |
|-----------|--------------------|
| Lithium   | 30                 |
| Sodium    | 2300               |
| Calcium   | 690                |
| Potassium | 430                |
| Magnesium | 1.5                |

**b**, composition of synthetic brine based on the Simbol Feed Brine (SFB; 04/20/2011 Report of Analysis)

| Analyte   | Concentration (mM) |
|-----------|--------------------|
| Lithium   | 42                 |
| Sodium    | 3100               |
| Potassium | 540                |
| Calcium   | 1070               |
| Iron      | 36                 |
| Manganese | 47                 |

**c**, composition of the Simbol Feed Brine (SFB; 2022 Report of Analysis)

| Analyte   | Concentration (mM) |
|-----------|--------------------|
| Lithium   | 34                 |
| Sodium    | 2700               |
| Calcium   | 940                |
| Potassium | 460                |
| Manganese | 38                 |
| Iron      | 30                 |
| Barium    | 4                  |
| Strontium | 6                  |
| Lead      | 0.5                |
| Copper    | 0.1                |
| Magnesium | 2                  |
| Aluminum  | 0.1                |
| Antimony  | <0.005             |
| Arsenic   | 0.01               |
| Silver    | <0.01              |

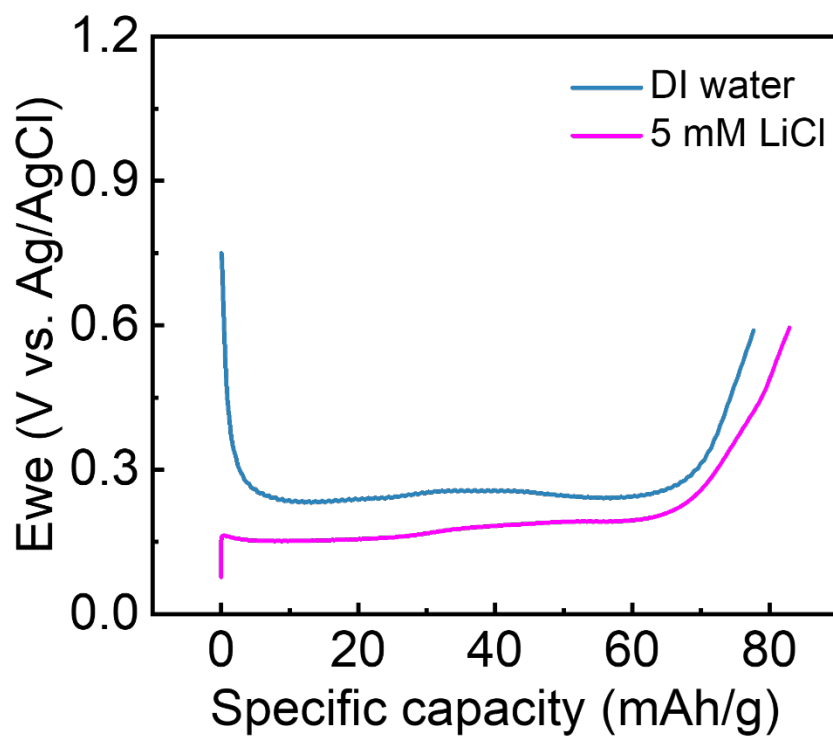

**Fig. S5. Specific capacity vs. Ewe curve by feeding DI water and 5 mM LiCl for Li release. (Ewe indicates working electrode potential). The potential is not IR corrected. Source data are provided as a Source Data file.**



**Table S2. Atomic composition of LiFePO<sub>4</sub> particle as different extraction stages.**

| Element | Atomic percentage (%) |                  |               |
|---------|-----------------------|------------------|---------------|
|         | Before extraction     | After extraction | After release |
| Na      | 0.0                   | 0.2              | 0.0           |
| Fe      | 20.1                  | 18.7             | 20.5          |
| P       | 17.0                  | 17.7             | 16.8          |
| O       | 62.8                  | 63.4             | 62.6          |

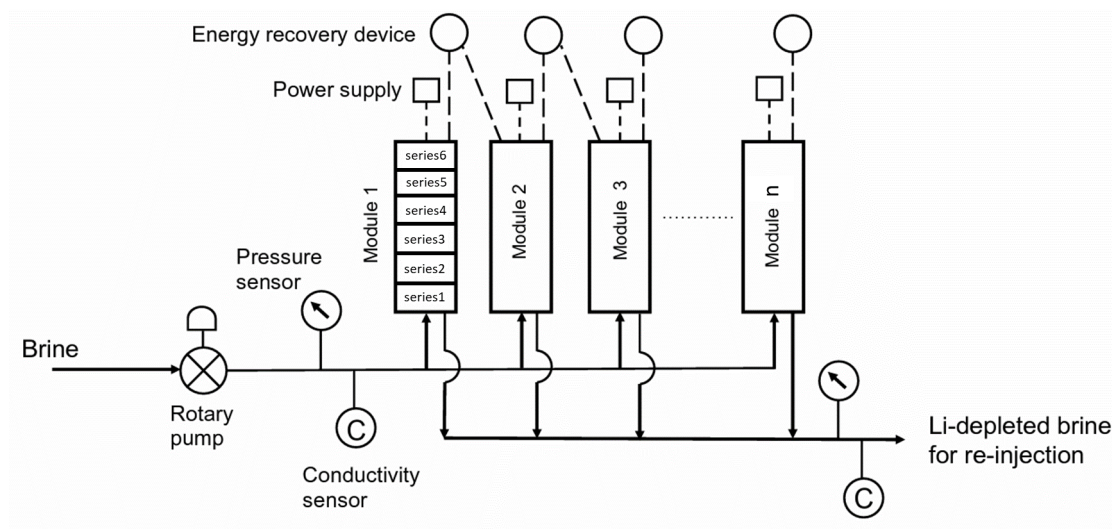

**Fig. S6. Module and system design of the Li extraction unit**

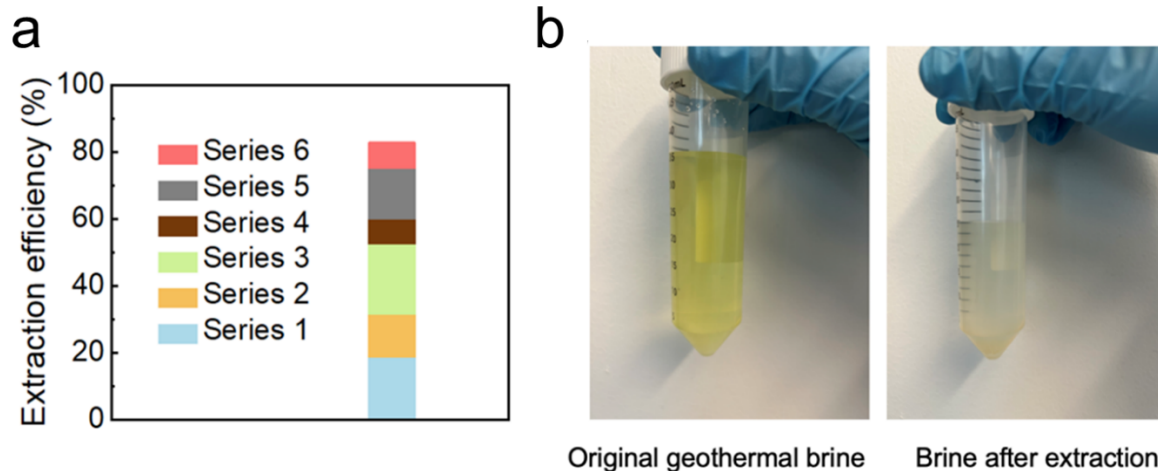

**Fig. S7. (a) Extraction efficiency in six series of extraction. The initial lithium concentration in the brine is 42 mM; after extraction in six cells in series, the lithium concentration remaining in the brine is 6.2 mM. (b) Photos of brine before and after extraction. Source data are provided as a Source Data file.**

**Table S3. Calculated enthalpy change,  $\Delta H_{rxn}$ , and activation energy,  $\Delta E_{act}$ , for the diffusion of various cations.**

| Cation           | $\Delta H_{rxn}$ (eV) | $\Delta E_{act}$ (eV) |
|------------------|-----------------------|-----------------------|
| Li <sup>+</sup>  | − 0.128               | 0.063                 |
| Na <sup>+</sup>  | 0.082                 | 0.404                 |
| K <sup>+</sup>   | N/A                   | N/A                   |
| Mg <sup>2+</sup> | 0.312                 | 0.523                 |
| Ca <sup>2+</sup> | 0.663                 | 0.942                 |

**Table S4. Calculated shortest metal-oxygen bond length,  $D_{M-O}$  for the initial, transition and final states along the cation's migration pathway.**

| <i>Cation</i> | $D_{M-O}^I(\text{\AA})$ | $D_{M-O}^T(\text{\AA})$ | $D_{M-O}^F(\text{\AA})$ |
|---------------|-------------------------|-------------------------|-------------------------|
| $Li^+$        | 2.01                    | 1.92                    | 1.97                    |
| $Na^+$        | 2.18                    | 2.03                    | 2.13                    |
| $K^+$         | N/A                     | N/A                     | N/A                     |
| $Mg^{2+}$     | 2.06                    | 1.92                    | 2.04                    |
| $Ca^{2+}$     | 2.24                    | 2.08                    | 2.16                    |

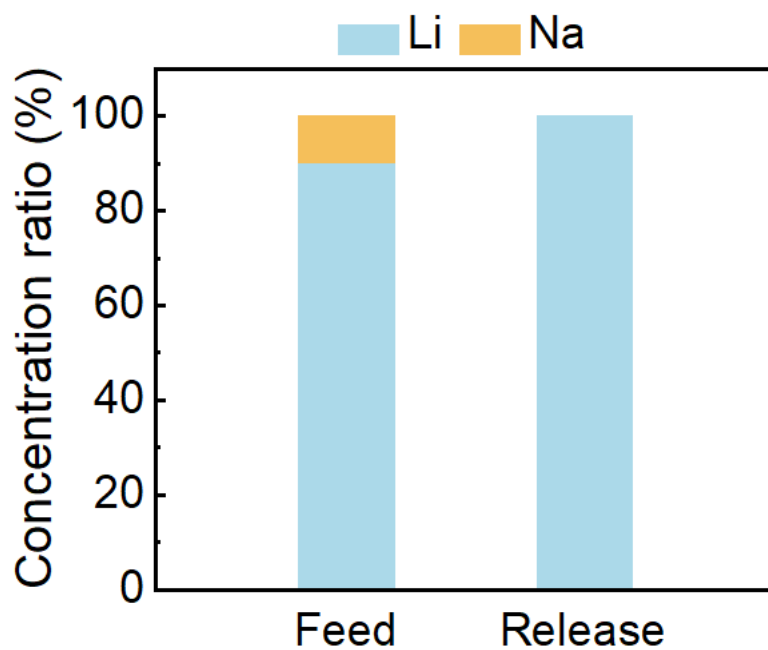

**Fig. S8. Metal element concentration percentage in the purification process. Source data are provided as a Source Data file.**

**Table S5.** Other parameters used for the techno-economic assessment

| <b>Financial parameters</b>     | <b>Variable</b>    | <b>Value</b> | <b>Unit</b>                            | <b>Source/Note</b> |
|---------------------------------|--------------------|--------------|----------------------------------------|--------------------|
| Total capital cost factor       | $F_{TCC}$          | 2.0          | (Total capital cost/equipment cost)    | <sup>1,2</sup>     |
| Maintenance & labor factor      | $F_{ML}$           | 2            | % of initial total capital cost/year   | <sup>3,4</sup>     |
| Chemical factor                 | $F_C$              | 1            | % of initial total capital cost/year   | <sup>3</sup>       |
| Peripherals Factor              | $F_P$              | 1.5          | (Peripherals cost/membrane stack cost) | <sup>5</sup>       |
| Plant Load Factor               | $\eta_{LF}$        | 90           | %                                      | <sup>3,6</sup>     |
| Spacer cost                     | $C_{SP}$           | 10           | \$/m <sup>2</sup>                      | <sup>5</sup>       |
| <b>System parameters</b>        | <b>Variable</b>    | <b>Value</b> | <b>Unit</b>                            | <b>Source/Note</b> |
| Electrode mass of active LFP    | $M_{(LFP,ex\ pr)}$ | 65.6         | mg                                     | This work          |
| Cycle length                    | $\tau$             | 16           | h                                      | This work          |
| Electrode density               | $\rho$             | 0.75         | g/cm <sup>3</sup>                      |                    |
| Operating current               | $I$                | 0.892        | mA                                     | This work          |
| The number of treatment trains  | $n_{train}$        | 1            |                                        |                    |
| BMED Operating Voltage          | $v$                | 2            | A                                      | Experimental Data  |
| BMED Cross sectional area       | $A_{BMED}$         | 0.25         | m <sup>2</sup>                         | <sup>7</sup>       |
| BMED Flowrate                   | $Q_{BMED}$         | 0.0025       | m <sup>3</sup> /s                      | <sup>7</sup>       |
| The number of IEMs in a cell    | $n_{IEM}$          | 4            | /                                      | This work          |
| The number of BPMs in a cell    | $n_{BPM}$          | 3            | /                                      | This work          |
| The number of spacers in a cell | $n_{SP}$           | 8            | /                                      | This work          |

**Table S6. Parameters for fresh water consumption calculations**

| Symbol                      | Meaning                                                 | Value | Unit         |
|-----------------------------|---------------------------------------------------------|-------|--------------|
| $r_{wash}$                  | The ratio of washing needed per extracted $\text{Li}^+$ | 0.15  | mL/mg        |
| $Q_{wash}$                  | Wash flowrate                                           | 0.005 | mL/min       |
| $t_{wash}$                  | Wash time                                               | 60    | min          |
| $V_{wash\_year}$            | Water volume for washing                                | 865   | $\text{m}^3$ |
| $mass_{\text{LiOH\_year}}$  | Mass of LiOH extracted in a year                        | 34885 | kg           |
| $mass_{\text{Li}^+\_year}$  | Mass of $\text{Li}^+$ extracted in a year               | 5770  | kg           |
| $mass_{\text{Li}^+\_cycle}$ | Mass of $\text{Li}^+$ extracted in a cycle              | 2     | mg           |



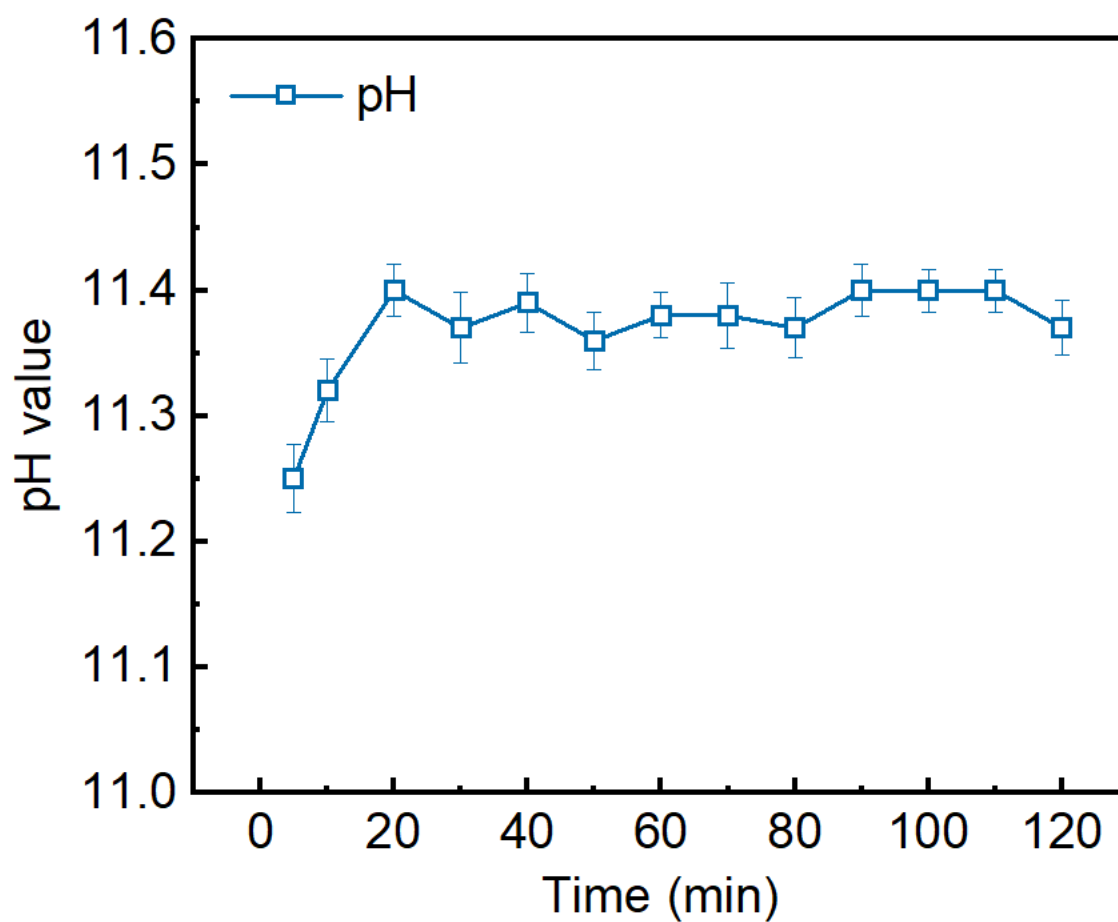

**Fig. S9.** pH values from the effluent in dilute-in channel along time. Source data are provided as a Source Data file.

**Table S7. Lithium selectivity over major metal elements with different direct lithium extraction technologies from brines.**

| Ions                              | Molar ratio in feed | Selectivity P              | Reference                   |
|-----------------------------------|---------------------|----------------------------|-----------------------------|
| Li <sup>+</sup> /Na <sup>+</sup>  | <b>1:77</b>         | <b>2.05×10<sup>3</sup></b> | <b>This work</b>            |
|                                   | 1:10                | ~17                        | Intercalation <sup>16</sup> |
|                                   | ~1:198              | ~12.8                      | Intercalation <sup>17</sup> |
|                                   | 1:100               | 500                        | Intercalation <sup>18</sup> |
|                                   | ~1:709              | 44                         | Adsorption <sup>19</sup>    |
|                                   | 1:0.8               | 9.8                        | Adsorption <sup>20</sup>    |
|                                   | 1:1                 | 18.2                       | Adsorption <sup>21</sup>    |
|                                   | 1:1                 | 1.5                        | Membrane <sup>22</sup>      |
|                                   | 1:1                 | ~2.3                       | Membrane <sup>23</sup>      |
|                                   | 1:1                 | ~5.3                       | Solvent <sup>24</sup>       |
| Li <sup>+</sup> /K <sup>+</sup>   | <b>1:14.3</b>       | <b>4.4×10<sup>3</sup></b>  | <b>This work</b>            |
|                                   | 1:10                | ~18                        | Intercalation <sup>16</sup> |
|                                   | ~1:1.2              | ~12                        | Intercalation <sup>17</sup> |
|                                   | 1:1                 | 1.9                        | Membrane <sup>22</sup>      |
|                                   | ~1:24               | 780                        | Adsorption <sup>19</sup>    |
|                                   | 1:1                 | 30.6                       | Adsorption <sup>21</sup>    |
|                                   | 1:1                 | ~12.3                      | Solvent <sup>24</sup>       |
| Li <sup>+</sup> /Ca <sup>2+</sup> | <b>1:23</b>         | <b>1.5×10<sup>4</sup></b>  | <b>This work</b>            |
|                                   | 1:10                | ~5                         | Intercalation <sup>16</sup> |
|                                   | ~1:2                | 20                         | Adsorption <sup>19</sup>    |

|                                   |               |                                           |                             |
|-----------------------------------|---------------|-------------------------------------------|-----------------------------|
|                                   | 1:1           | 0.9                                       | Membrane <sup>22</sup>      |
| Li <sup>+</sup> /Mg <sup>2+</sup> | <b>1:0.05</b> | <b>Mg undetected in released solution</b> | <b>This work</b>            |
|                                   | 1:10          | ~3                                        | Intercalation <sup>16</sup> |
|                                   | 1:1           | 57.7                                      | Adsorption <sup>20</sup>    |
|                                   | 1:1           | 15.1                                      | Adsorption <sup>21</sup>    |
|                                   | ~1:73         | 40                                        | Adsorption <sup>19</sup>    |
|                                   | 1:1           | 0.6                                       | Membrane <sup>22</sup>      |
|                                   | 1:1           | ~10                                       | Membrane <sup>23</sup>      |
|                                   | ~1:12         | ~257                                      | Precipitation <sup>25</sup> |

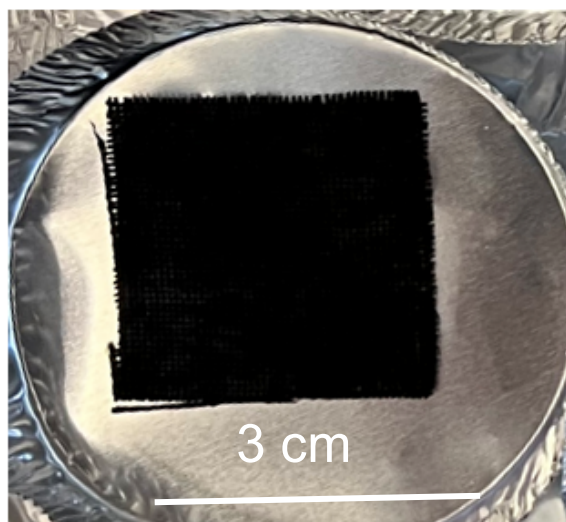

**Fig. S10.** Photo of as-fabricated  $\text{LiFePO}_4$  composite electrode.

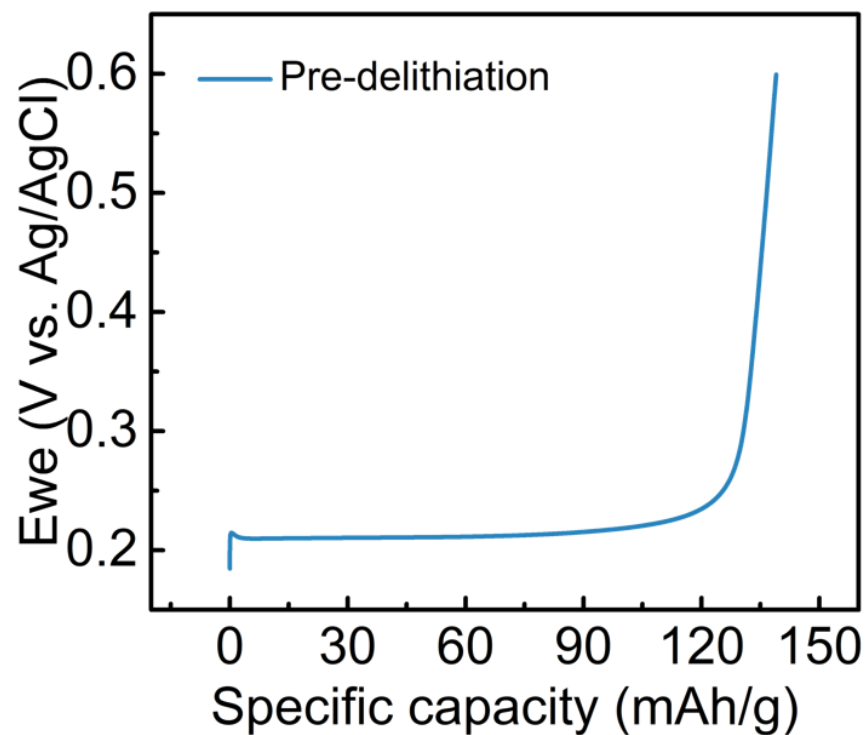

**Fig. S11. Specific capacity vs. Ewe curve in pre-delithiation process. (Ewe indicates working electrode potential). The potential is not IR corrected. Source data are provided as a Source Data file.**

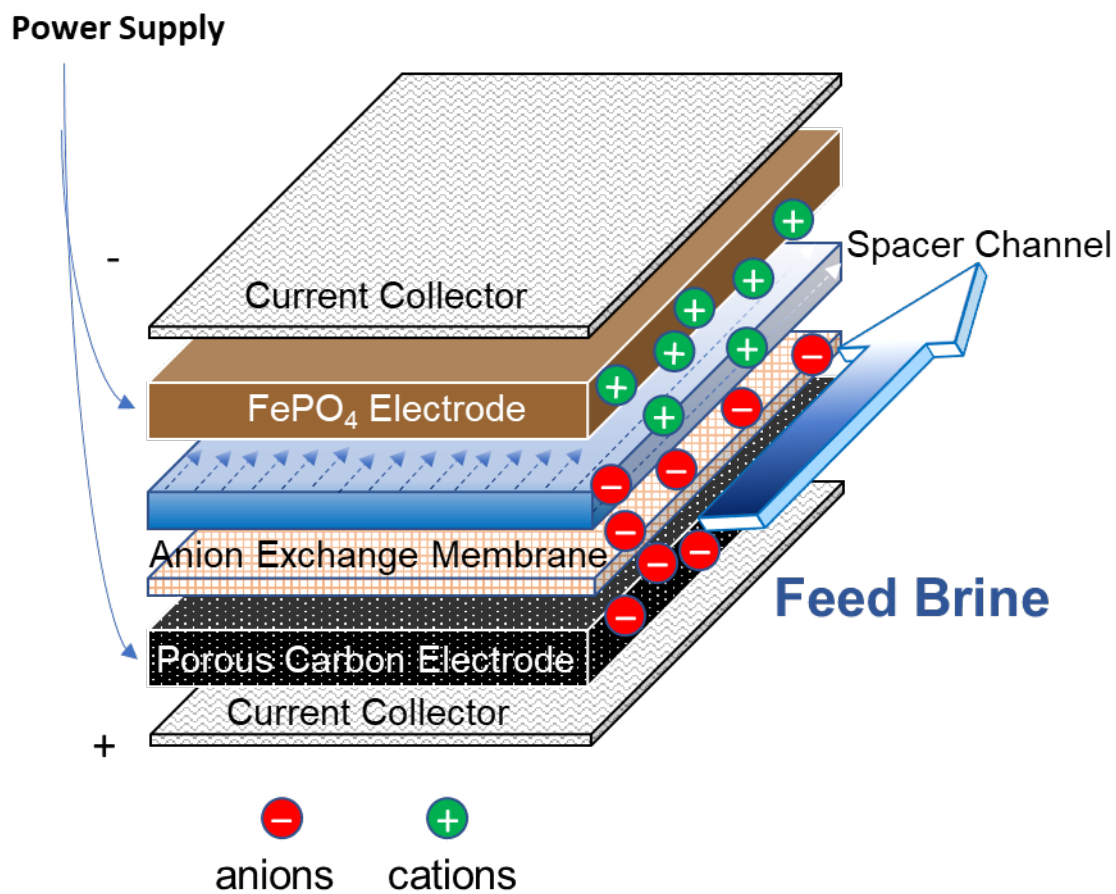

**Fig. S12. 3D schematic diagram of intercalative deionization cell for lithium extraction experiment.**

## Supplementary References

- 1 Malek, A., Hawlader, M. N. A. & Ho, J. C. Design and economics of RO seawater desalination. *Desalination* **105**, 245-261, doi:[https://doi.org/10.1016/0011-9164\(96\)00081-1](https://doi.org/10.1016/0011-9164(96)00081-1) (1996).
- 2 Huyskens, C., Helsen, J., Groot, W. J. & de Haan, A. B. Cost evaluation of large-scale membrane capacitive deionization for biomass hydrolysate desalination. *Separation and Purification Technology* **146**, 294-300, doi:<https://doi.org/10.1016/j.seppur.2015.03.031> (2015).
- 3 Vince, F., Marechal, F., Aoustin, E. & Bréant, P. Multi-objective optimization of RO desalination plants. *Desalination* **222**, 96-118, doi:<https://doi.org/10.1016/j.desal.2007.02.064> (2008).
- 4 Park, C. *et al.* Stochastic cost estimation approach for full-scale reverse osmosis desalination plants. *Journal of Membrane Science* **364**, 52-64, doi:<https://doi.org/10.1016/j.memsci.2010.07.055> (2010).
- 5 Lei, C. *et al.* Comparative study on the production of gluconic acid by electrodialysis and bipolar membrane electrodialysis: Effects of cell configurations. *Journal of Membrane Science* **608**, 118192, doi:<https://doi.org/10.1016/j.memsci.2020.118192> (2020).
- 6 Sarai Atab, M., Smallbone, A. J. & Roskilly, A. P. An operational and economic study of a reverse osmosis desalination system for potable water and land irrigation. *Desalination* **397**, 174-184, doi:<https://doi.org/10.1016/j.desal.2016.06.020> (2016).
- 7 Culcasi, A., Gurreri, L., Cipollina, A., Tamburini, A. & Micale, G. A comprehensive multi-scale model for bipolar membrane electrodialysis (BMED). *Chemical Engineering Journal* **437**, 135317, doi:<https://doi.org/10.1016/j.ccej.2022.135317> (2022).
- 8 Poullikkas, A. Optimization algorithm for reverse osmosis desalination economics. *Desalination* **133**, 75-81, doi:[https://doi.org/10.1016/S0011-9164\(01\)00084-4](https://doi.org/10.1016/S0011-9164(01)00084-4) (2001).
- 9 Li, W.-W., Yu, H.-Q. & He, Z. Towards sustainable wastewater treatment by using microbial fuel cells-centered technologies. *Energy & Environmental Science* **7**, 911-924, doi:10.1039/C3EE43106A (2014).
- 10 Yee, R. S. L., Rozendal, R. A., Zhang, K. & Ladewig, B. P. Cost effective cation exchange membranes: A review. *Chemical Engineering Research and Design* **90**, 950-959, doi:<https://doi.org/10.1016/j.cherd.2011.10.015> (2012).
- 11 Guidelines for Preparing Economic Analyses. (U.S. Environmental Protection Agency, 2010).
- 12 Salton Sea Brine Chemistry. (U.S. Department of Energy, Geothermal Technologies Office 2021).
- 13 Strathmann, H., Grabowski, A. & Eigenberger, G. Ion-Exchange Membranes in the Chemical Process Industry. *Industrial & Engineering Chemistry Research* **52**, 10364-10379, doi:10.1021/ie4002102 (2013).
- 14 Yan, G., Wang, M., Hill, G. T., Zou, S. & Liu, C. Defining the challenges of Li extraction with olivine host: The roles of competitor and spectator ions. *Proceedings of the National Academy of Sciences* **119**, e2200751119 (2022).
- 15 Yee, R. S. L., Rozendal, R. A., Zhang, K. & Ladewig, B. P. Cost effective cation exchange membranes: A review. *Chemical Engineering Research & Design* **90**, 950-959,

- doi:10.1016/j.cherd.2011.10.015 (2012).
- 16 Lee, D.-H. *et al.* Selective lithium recovery from aqueous solution using a modified membrane capacitive deionization system. *Hydrometallurgy* **173**, 283-288, doi:<https://doi.org/10.1016/j.hydromet.2017.09.005> (2017).
  - 17 Siekierka, A., Tomaszewska, B. & Bryjak, M. Lithium capturing from geothermal water by hybrid capacitive deionization. *Desalination* **436**, 8-14, doi:<https://doi.org/10.1016/j.desal.2018.02.003> (2018).
  - 18 Pasta, M., Battistel, A. & La Mantia, F. Batteries for lithium recovery from brines. *Energy & Environmental Science* **5**, 9487-9491, doi:10.1039/C2EE22977C (2012).
  - 19 Marthi, R. & Smith, Y. R. Application and limitations of a H<sub>2</sub>TiO<sub>3</sub> – Diatomaceous earth composite synthesized from titania slag as a selective lithium adsorbent. *Separation and Purification Technology* **254**, 117580, doi:<https://doi.org/10.1016/j.seppur.2020.117580> (2021).
  - 20 Kim, B., Seo, J. Y. & Chung, C.-H. Electrochemical Desalination and Recovery of Lithium from Saline Water upon Operation of a Capacitive Deionization Cell Combined with a Redox Flow Battery. *ACS ES&T Water* **1**, 1047-1054, doi:10.1021/acsestwater.1c00014 (2021).
  - 21 Li, X. *et al.* Amorphous TiO<sub>2</sub>-Derived Large-Capacity Lithium Ion Sieve for Lithium Recovery. *Chemical Engineering & Technology* **43**, 1784-1791, doi:<https://doi.org/10.1002/ceat.201900374> (2020).
  - 22 Yu, H. *et al.* Selective lithium extraction from diluted binary solutions using metal-organic frameworks (MOF)-based membrane capacitive deionization (MCDI). *Desalination* **556**, 116569, doi:<https://doi.org/10.1016/j.desal.2023.116569> (2023).
  - 23 Warnock, S. J. *et al.* Engineering Li/Na selectivity in 12-Crown-4-functionalized polymer membranes. *Proceedings of the National Academy of Sciences* **118**, e2022197118, doi:10.1073/pnas.2022197118 (2021).
  - 24 Shi, C. *et al.* Solvent extraction of lithium from aqueous solution using non-fluorinated functionalized ionic liquids as extraction agents. *Separation and Purification Technology* **172**, 473-479, doi:<https://doi.org/10.1016/j.seppur.2016.08.034> (2017).
  - 25 Lai, X., Xiong, P. & Zhong, H. Extraction of lithium from brines with high Mg/Li ratio by the crystallization-precipitation method. *Hydrometallurgy* **192**, 105252, doi:<https://doi.org/10.1016/j.hydromet.2020.105252> (2020).
