# Supplementary material for: Electro-driven direct lithium extraction from geothermal brines to generate battery-grade lithium hydroxide
Source: Springer Nature journal article supplement (doi:10.1038/s41467-025-56071-x), 2025-01-18
Supplement: MOESM3 [file 41467_2025_56071_MOESM3_ESM.pdf › 41467_2025_56071_MOESM3_ESM.pdf]

## **Description of Additional Supplementary Files**

### **Supplementary Data 1: List of CP2K Input Files**

1. BASIS\_SET: basis set file in the CP2K format
2. POTENTIAL: pseudopotential file in the CP2K format
3. NEB\_FEPOR\_Li.inp: nudged elastic band simulation file
4. FEPO4\_Li\_Initial\_State.xyz: geometry file of the initial state in the XYZ format
5. FEPO4\_Li\_Final\_State.xyz: geometry file of the final state in the XYZ format
